# Supplementary material for: Sugar-free frosting, a homolog of SAD kinase, drives neural-specific glycan expression in the Drosophila embryo
Source: Oxford University Press journal article supplement (doi:10.1242/dev.055376), 2011-01-04
Supplement: dev055376supptable1.pdf [file dev055376supptable1.pdf]

**Table S1. Viability of *sff* homozygotes**

| Genotype                                                                                                   | Number of embryos at start | Number of pupae | % of expected | Number of adults | % of expected |
|------------------------------------------------------------------------------------------------------------|----------------------------|-----------------|---------------|------------------|---------------|
| wild type                                                                                                  | 457                        | 373             | 82            | 364              | 80            |
| <i>sff</i> <sup>B22</sup>                                                                                  | 560                        | 219             | 39            | 207              | 37            |
| '% of expected' for each genotype at each stage is calculated relative to the 'Number of embryos at start' |                            |                 |               |                  |               |
