# Supplementary material for: Sugar-free frosting, a homolog of SAD kinase, drives neural-specific glycan expression in the Drosophila embryo
Source: Oxford University Press journal article supplement (doi:10.1242/dev.055376), 2011-01-04
Supplement: dev055376supptable3.pdf [file dev055376supptable3.pdf]

**Table S3. Proteomic analysis of wild-type and *sff* adult heads**

| Protein                                                       | Peptides                           | Genotype                  | Charge | XCorr |
|---------------------------------------------------------------|------------------------------------|---------------------------|--------|-------|
| Endoribonuclease Dcr-1 (Control)                              | LEFLGDAVL DYLI TRHLYEDPR*          | wild-type                 | 2      | 2.0   |
|                                                               |                                    | <i>sff</i> <sup>B22</sup> | 2      | 1.5   |
| Guanine nucleotide releasing factor 2 (Control)               | NISHSQTMNIMPMSK*                   | wild-type                 | 2      | 1.0   |
|                                                               |                                    | <i>sff</i> <sup>B22</sup> | 2      | 1.6   |
| Sff peptides with Xcorr $\geq 1.2$ in wild type or <i>sff</i> | RQVIENDMENDSIFSYK*                 | wild-type                 | 2      | 2.2   |
|                                                               |                                    | <i>sff</i> <sup>B22</sup> | nd     |       |
|                                                               | IERRDSLRL                          | wild-type                 | 2      | 1.6   |
|                                                               |                                    | <i>sff</i> <sup>B22</sup> | nd     |       |
|                                                               | LGVHVIGK <sup>†</sup>              | wild-type                 | 2      | 1.2   |
|                                                               |                                    | <i>sff</i> <sup>B22</sup> | 2      | 0.5   |
|                                                               | VEREIAIMK <sup>‡</sup>             | wild-type                 | 2      | 0.8   |
|                                                               |                                    | <i>sff</i> <sup>B22</sup> | 2      | 1.6   |
|                                                               | LEKTLGKGQTGLVK                     | wild-type                 | 2      | 0.7   |
|                                                               |                                    | <i>sff</i> <sup>B22</sup> | 2      | 1.3   |
| Sff peptides with Xcorr<1.2                                   | 17 additional peptides             | wild-type                 | 1-5    | <1.2  |
|                                                               | 6 additional peptides <sup>§</sup> | <i>sff</i> <sup>B22</sup> | 1-2    | <1.2  |

nd denotes that the peptide was not detected in *sff* mutant.

\*See Fig. S6 in the supplementary material for LC-MS/MS base peak chromatograms.

<sup>†</sup>Detected as its carbamidomethylated form in wild type and as a missed cleavage (LGVHVIGKKVAIK) in *sff* mutant.

<sup>‡</sup>Oxidized in wild type.

<sup>§</sup>Two of the six additional peptides detected in *sff* mutant heads were also detected in wild type.
